# Supplementary material
Source: PubMed Central journal article supplement (PMC4764037)

SUPPLEMENTARY DATA

**Supplementary Table 1. Anthropometric and metabolic data for age and gender matched participants**

|                               | NGT (n = 218)      | T2D (n = 47)              | LADA (n = 41)             | T1D (n = 44)              |
|-------------------------------|--------------------|---------------------------|---------------------------|---------------------------|
| Male (%)                      | 40.4 (88/218)      | 51.1 (24/47)              | 56.1 (23/41)              | 50.0 (22/44)              |
| Age (years)                   | 41.37 ± 13.52      | 41.85 ± 8.06              | 41.98 ± 9.76              | 37.75 ± 14.97             |
| BMI (kg/m <sup>2</sup> )      | 23.10 ± 3.77       | 24.31 ± 3.43              | 21.69 ± 2.83 *††          | 20.41 ± 2.93 ***†††       |
| SBP (mmHg)¶                   | 111 (105 - 122)    | 120 (105 - 130)           | 115 (109 - 126)           | 110 (100 - 124)           |
| DBP (mmHg)¶                   | 74 (70 - 80)       | 80 (70 - 87)              | 77 (70 - 81)              | 72 (67 - 81)              |
| TG (mmol/L) §                 | 1.05 (0.69 - 1.61) | 2.20 (1.24 - 3.21) ***‡‡‡ | 1.11 (0.79 - 1.72) ††     | 0.91 (0.68 - 1.69)        |
| TC (mmol/L)                   | 4.90 ± 1.00        | 5.31 ± 1.18               | 4.87 ± 1.11               | 4.68 ± 1.45               |
| LDL-C (mmol/L)                | 2.74 ± 0.87        | 3.35 ± 0.96 **‡‡          | 3.09 ± 0.96 *             | 2.71 ± 1.30               |
| HDL-C (mmol/L)¶               | 1.36 (1.14 - 1.58) | 1.02 (0.80 - 1.18) ***‡‡‡ | 1.24 (0.91 - 1.42)        | 1.24 (0.89 - 1.74)        |
| HbA <sub>1c</sub> (%)¶        | /                  | 8.60 (5.90 - 10.80)       | 7.55 (6.65 - 12.70)       | 9.20 (7.35 - 11.93)       |
| HbA <sub>1c</sub> (mmol/mol)¶ | /                  | 70 (41 - 95)              | 59 (49 - 115)             | 77 (54 - 107)             |
| FBG (mmol/L)¶                 | 5.09 (4.70 - 5.40) | 7.47 (6.39 - 11.09) ***   | 8.27 (6.31 - 11.54) ***   | 8.65 (6.43 - 13.10) ***   |
| FCP (mmol/L)¶                 | 0.42 (0.33 - 0.54) | 0.51 (0.32 - 0.69)        | 0.19 (0.12 - 0.33) ***††† | 0.07 (0.03 - 0.19) ***††† |

¶, Data expressed as median values (25th-75th percentiles) and compared by the nonparametric Kruskal-Wallis test; §, Data expressed as median values (25th-75th percentiles) and compared after Log transformation. Other data expressed by Mean ± SD. Compared with NGT \**P* < 0.05, \*\**P* < 0.01, \*\*\**P* < 0.001. Compared with T2D †*P* < 0.05, ††*P* < 0.01, †††*P* < 0.001; compared with T1D, ‡*P* < 0.05, ‡‡*P* < 0.01, ‡‡‡*P* < 0.001. LADA, patients with latent autoimmune diabetes in adults; N/A, not appropriate; NGT, normal glucose tolerance subjects; T1D, type 1 diabetic subjects; T2D, type 2 diabetic subjects.

## SUPPLEMENTARY DATA

**Supplementary Figure 1.** The frequency of CD19<sup>+</sup> B lymphocytes in subtypes of diabetes and controls. Each point represents the frequency of CD19<sup>+</sup> B lymphocytes of an individual. Horizontal lines show medians. NGT, normal glucose tolerance subjects; LADA, latent autoimmune diabetes in adults subjects; T1D, type 1 diabetic subjects; T2D, type 2 diabetic subjects.

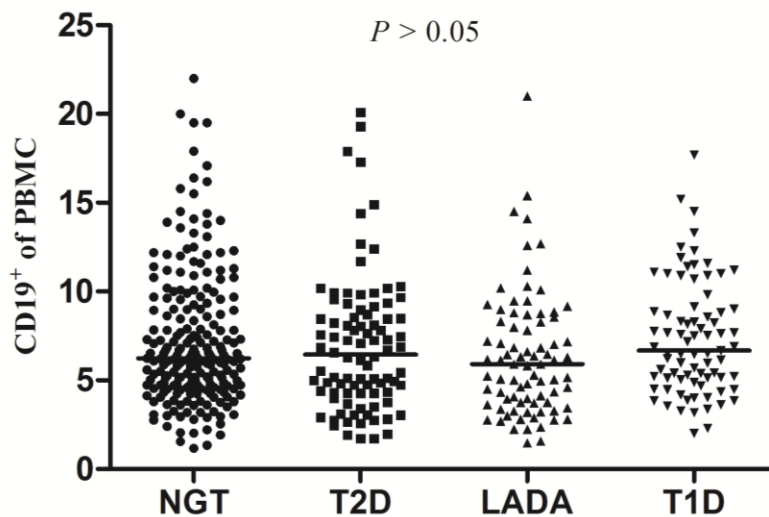

SUPPLEMENTARY DATA

**Supplementary Figure 2.** The frequency of B cell subsets in age and gender matched subjects. The frequency of MZB (A), FoB (B), T2-MZP B (C), B10 (D) cells gated on CD19<sup>+</sup> B cells. *P* values refer to comparison of data after adjustment for BMI. Each point represents the percentage of B cell subsets of an individual. Horizontal lines show medians. \* *P* < 0.05, \*\* *P* < 0.01, \*\*\* *P* < 0.001. NGT, normal glucose tolerance subjects; LADA, latent autoimmune diabetes in adults subjects; T1D, type 1 diabetic subjects; T2D, type 2 diabetic subjects.

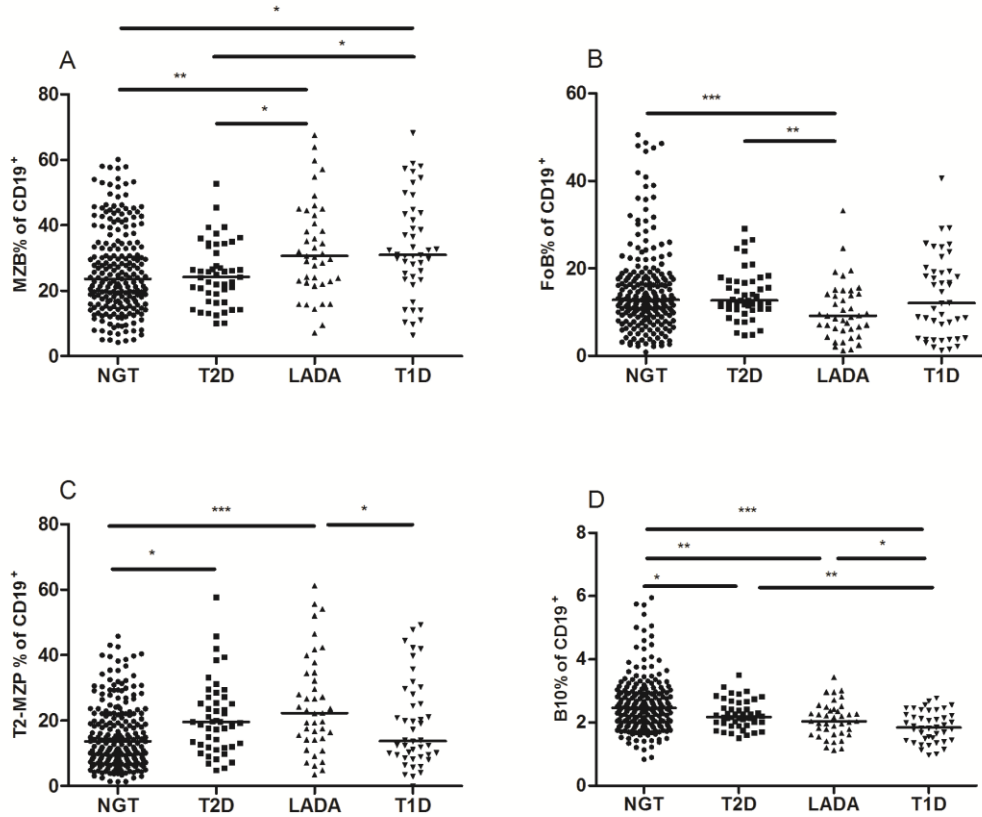

Supplement: supp_dc15-1765v151765_DC151765SupplementaryData.pdf [file supp_dc15-1765v151765_DC151765SupplementaryData.pdf]
